# Supplementary material
Source: PubMed Central journal article supplement (PMC10469290)
Supplement: jamadermatol-e232875-s001.pdf [file jamadermatol-e232875-s001.pdf]

## Supplementary Online Content

Chiesa Fuxench ZC, Wan J, Wang S, et al. Risk of inflammatory bowel disease in patients with atopic dermatitis. *JAMA Dermatol*. Published online August 30, 2023. doi:10.1001/jamadermatol.2023.2875

**eTable 1.** Risk of Inflammatory Bowel Disease in Patients With Atopic Dermatitis Stratified by Disease Severity: Primary and Sensitivity Analyses

**eTable 2.** E-Value Computations for Both Relative Risk and Confidence Interval Closest to the Null

This supplementary material has been provided by the authors to give readers additional information about their work.

**eTable 1. Risk of Inflammatory Bowel Disease in Patients With Atopic Dermatitis Stratified by Disease Severity: Primary and Sensitivity Analyses**

| Outcome                                                         | Adjusted Hazards Ratio (95% Confidence Interval) |                      |                      |                      |                          |                      |                      |                      |
|-----------------------------------------------------------------|--------------------------------------------------|----------------------|----------------------|----------------------|--------------------------|----------------------|----------------------|----------------------|
|                                                                 | Pediatric Cohort (<18 y/o)                       |                      |                      |                      | Adult Cohort (>= 18 y/o) |                      |                      |                      |
|                                                                 | Atopic Dermatitis Disease Severity               |                      |                      |                      |                          |                      |                      |                      |
|                                                                 | Overall AD                                       | Mild                 | Moderate             | Severe               | Overall AD               | Mild                 | Moderate             | Severe               |
| <b>All inflammatory bowel disease</b>                           |                                                  |                      |                      |                      |                          |                      |                      |                      |
| Primary analysis                                                | 1.44<br>(1.31, 1.58)                             | 1.36<br>(1.22, 1.51) | 1.48<br>(1.24, 1.77) | 2.59<br>(1.94, 3.45) | 1.34<br>(1.27, 1.40)     | 1.18<br>(1.10, 1.26) | 1.44<br>(1.34, 1.55) | 2.27<br>(1.96, 2.64) |
| Excluding patients with asthma                                  | 1.44<br>(1.29, 1.61)                             | 1.40<br>(1.24, 1.59) | 1.40<br>(1.11, 1.76) | 2.55<br>(1.75, 3.72) | 1.33<br>(1.25, 1.40)     | 1.14<br>(1.06, 1.23) | 1.47<br>(1.36, 1.59) | 2.37<br>(2.00, 2.82) |
| Excluding patients with asthma or allergic rhinitis             | 1.44<br>(1.28, 1.62)                             | 1.42<br>(1.24, 1.61) | 1.29<br>(1.00, 1.66) | 2.70<br>(1.84, 3.97) | 1.32<br>(1.25, 1.41)     | 1.13<br>(1.05, 1.23) | 1.47<br>(1.35, 1.60) | 2.38<br>(1.99, 2.85) |
| Restricted to patients seen at least yearly during follow-up    | 1.37<br>(1.25, 1.51)                             | 1.30<br>(1.17, 1.45) | 1.39<br>(1.16, 1.67) | 2.45<br>(1.84, 3.26) | 1.31<br>(1.24, 1.37)     | 1.16<br>(1.08, 1.23) | 1.41<br>(1.31, 1.51) | 2.22<br>(1.91, 2.58) |
| Restricted to patients seen for >= 1 year prior to cohort entry | 1.44<br>(1.31, 1.58)                             | 1.36<br>(1.22, 1.51) | 1.48<br>(1.24, 1.77) | 2.59<br>(1.94, 3.45) | 1.34<br>(1.27, 1.40)     | 1.18<br>(1.10, 1.26) | 1.44<br>(1.34, 1.55) | 2.27<br>(1.96, 2.64) |
| Restricted to patients with at least 5 years of follow-up       | 1.41<br>(1.28, 1.56)                             | 1.33<br>(1.19, 1.49) | 1.49<br>(1.23, 1.79) | 2.41<br>(1.77, 3.27) | 1.31<br>(1.24, 1.39)     | 1.15<br>(1.07, 1.24) | 1.42<br>(1.31, 1.54) | 2.18<br>(1.85, 2.57) |
| Excluding patients with IBD-related medications                 | 1.47<br>(1.33, 1.61)                             | 1.39<br>(1.25, 1.55) | 1.52<br>(1.27, 1.82) | 2.51<br>(1.86, 3.40) | 1.35<br>(1.28, 1.42)     | 1.20<br>(1.13, 1.29) | 1.47<br>(1.37, 1.58) | 2.17<br>(1.81, 2.59) |
| <b>Crohn's disease only</b>                                     |                                                  |                      |                      |                      |                          |                      |                      |                      |
| Primary analysis                                                | 1.74<br>(1.54, 1.97)                             | 1.59<br>(1.38, 1.83) | 1.66<br>(1.30, 2.11) | 4.80<br>(3.55, 6.49) | 1.36<br>(1.26, 1.47)     | 1.14<br>(1.03, 1.27) | 1.38<br>(1.23, 1.55) | 3.50<br>(2.91, 4.20) |
| Excluding patients with asthma                                  | 1.79<br>(1.54, 2.07)                             | 1.67<br>(1.41, 1.97) | 1.72<br>(1.27, 2.32) | 4.58<br>(3.06, 6.85) | 1.38<br>(1.26, 1.50)     | 1.13<br>(1.00, 1.28) | 1.42<br>(1.24, 1.61) | 3.72<br>(3.03, 4.58) |
| Excluding patients with asthma or allergic rhinitis             | 1.78<br>(1.53, 2.08)                             | 1.68<br>(1.41, 2.00) | 1.60<br>(1.16, 2.23) | 4.83<br>(3.20, 7.28) | 1.35<br>(1.23, 1.49)     | 1.13<br>(0.99, 1.28) | 1.37<br>(1.19, 1.58) | 3.55<br>(2.84, 4.44) |
| Restricted to patients seen at least yearly during follow-up    | 1.67<br>(1.47, 1.88)                             | 1.53<br>(1.33, 1.76) | 1.56<br>(1.22, 1.98) | 4.54<br>(3.36, 6.13) | 1.33<br>(1.23, 1.44)     | 1.12<br>(1.01, 1.24) | 1.35<br>(1.21, 1.52) | 3.41<br>(2.84, 4.09) |
| Restricted to patients seen for >= 1 year prior to cohort entry | 1.74<br>(1.54, 1.97)                             | 1.59<br>(1.38, 1.83) | 1.66<br>(1.30, 2.11) | 4.80<br>(3.55, 6.49) | 1.36<br>(1.26, 1.47)     | 1.14<br>(1.03, 1.27) | 1.38<br>(1.23, 1.55) | 3.50<br>(2.91, 4.20) |

|                                                                 |                      |                      |                      |                       |                      |                      |                      |                      |
|-----------------------------------------------------------------|----------------------|----------------------|----------------------|-----------------------|----------------------|----------------------|----------------------|----------------------|
| Restricted to patients with at least 5 years of follow-up       | 1.70<br>(1.49, 1.94) | 1.56<br>(1.34, 1.81) | 1.63<br>(1.27, 2.10) | 4.38<br>(3.17, 6.04)  | 1.33<br>(1.22, 1.45) | 1.12<br>(0.99, 1.26) | 1.33<br>(1.17, 1.51) | 3.31<br>(2.70, 4.05) |
| Excluding patients with IBD-related medications                 | 1.86<br>(1.64, 2.11) | 1.72<br>(1.49, 1.99) | 1.83<br>(1.43, 2.33) | 4.69<br>(3.37, 6.52)  | 1.41<br>(1.30, 1.53) | 1.22<br>(1.10, 1.36) | 1.49<br>(1.33, 1.67) | 3.24<br>(2.56, 4.10) |
| <b>Ulcerative colitis only</b>                                  |                      |                      |                      |                       |                      |                      |                      |                      |
| Primary analysis                                                | 1.09<br>(0.94, 1.27) | 1.07<br>(0.90, 1.27) | 1.03<br>(0.77, 1.40) | 1.65<br>(1.02, 2.67)  | 1.32<br>(1.24, 1.41) | 1.14<br>(1.05, 1.24) | 1.43<br>(1.31, 1.57) | 2.40<br>(2.00, 2.88) |
| Excluding patients with asthma                                  | 1.06<br>(0.89, 1.27) | 1.11<br>(0.91, 1.35) | 0.78<br>(0.51, 1.19) | 1.43<br>(0.74, 2.77)  | 1.29<br>(1.20, 1.38) | 1.08<br>(0.98, 1.20) | 1.45<br>(1.31, 1.61) | 2.29<br>(1.85, 2.83) |
| Excluding patients with asthma or allergic rhinitis             | 1.04<br>(0.86, 1.25) | 1.12<br>(0.92, 1.38) | 0.59<br>(0.35, 0.99) | 1.55<br>(0.80, 3.00)  | 1.30<br>(1.21, 1.41) | 1.08<br>(0.97, 1.20) | 1.47<br>(1.32, 1.64) | 2.45<br>(1.97, 3.04) |
| Restricted to patients seen at least yearly during follow-up    | 1.05<br>(0.90, 1.22) | 1.03<br>(0.87, 1.22) | 0.98<br>(0.73, 1.32) | 1.57<br>(0.97, 12.55) | 1.29<br>(1.21, 1.38) | 1.12<br>(1.02, 1.22) | 1.40<br>(1.28, 1.53) | 2.34<br>(1.96, 2.81) |
| Restricted to patients seen for >= 1 year prior to cohort entry | 1.09<br>(0.94, 1.27) | 1.07<br>(0.90, 1.27) | 1.03<br>(0.77, 1.40) | 1.65<br>(1.02, 2.67)  | 1.32<br>(1.24, 1.41) | 1.14<br>(1.05, 1.24) | 1.43<br>(1.31, 1.57) | 2.40<br>(1.00, 2.88) |
| Restricted to patients with at least 5 years of follow-up       | 1.07<br>(0.91, 1.26) | 1.05<br>(0.87, 1.26) | 1.02<br>(0.75, 1.40) | 1.55<br>(0.93, 2.59)  | 1.32<br>(1.23, 1.42) | 1.13<br>(1.02, 1.24) | 1.45<br>(1.31, 1.60) | 2.31<br>(1.89, 2.82) |
| Excluding patients with IBD-related medications                 | 1.11<br>(0.95, 1.29) | 1.10<br>(0.92, 1.31) | 1.07<br>(0.79, 1.44) | 1.50<br>(0.88, 2.56)  | 1.33<br>(1.25, 1.42) | 1.18<br>(1.08, 1.28) | 1.48<br>(1.35, 1.62) | 2.13<br>(1.69, 2.68) |

**eTable 2. E-Value Computations for Both Relative Risk and Confidence Interval Closest to the Null**

| <b>Inflammatory Bowel Disease</b> |                                |                      |                                   |                                   |                                   |
|-----------------------------------|--------------------------------|----------------------|-----------------------------------|-----------------------------------|-----------------------------------|
| <b>Age Cohort</b>                 | <b>AD<sup>1</sup> severity</b> | <b>Relative Risk</b> | <b>Lower limit CI<sup>2</sup></b> | <b>E-value for RR<sup>3</sup></b> | <b>E-value for lower limit CI</b> |
| Pediatric cohort                  | Overall                        | 1.44                 | 1.31                              | 2.24                              | 1.95                              |
| Pediatric cohort                  | Mild                           | 1.36                 | 1.22                              | 2.06                              | 1.74                              |
| Pediatric cohort                  | Moderate                       | 1.48                 | 1.24                              | 2.32                              | 1.79                              |
| Pediatric cohort                  | Severe                         | 2.59                 | 1.94                              | 4.62                              | 3.29                              |
| Adult cohort                      | Overall                        | 1.34                 | 1.27                              | 2.01                              | 1.86                              |
| Adult cohort                      | Mild                           | 1.18                 | 1.10                              | 1.64                              | 1.43                              |
| Adult cohort                      | Moderate                       | 1.44                 | 1.34                              | 2.24                              | 2.01                              |
| Adult cohort                      | Severe                         | 2.27                 | 1.96                              | 3.97                              | 3.33                              |
| <b>Crohn's Disease</b>            |                                |                      |                                   |                                   |                                   |
| <b>Age Cohort</b>                 | <b>AD severity</b>             | <b>Relative Risk</b> | <b>Lower limit CI</b>             | <b>E-value for RR</b>             | <b>E-value for lower limit CI</b> |
| Pediatric cohort                  | Overall                        | 1.74                 | 1.54                              | 2.87                              | 2.45                              |
| Pediatric cohort                  | Mild                           | 1.59                 | 1.38                              | 2.56                              | 2.10                              |
| Pediatric cohort                  | Moderate                       | 1.66                 | 1.30                              | 2.71                              | 1.92                              |
| Pediatric cohort                  | Severe                         | 4.80                 | 3.55                              | 9.23                              | 6.56                              |
| Adult cohort                      | Overall                        | 1.36                 | 1.26                              | 2.06                              | 1.83                              |
| Adult cohort                      | Mild                           | 1.14                 | 1.03                              | 1.54                              | 1.21                              |
| Adult cohort                      | Moderate                       | 1.38                 | 1.23                              | 2.10                              | 1.76                              |
| Adult cohort                      | Severe                         | 3.50                 | 2.91                              | 6.46                              | 5.27                              |
| <b>Ulcerative Colitis</b>         |                                |                      |                                   |                                   |                                   |
| <b>Age Cohort</b>                 | <b>AD severity</b>             | <b>Relative Risk</b> | <b>Lower limit CI</b>             | <b>E-value for RR</b>             | <b>E-value for lower limit CI</b> |
| Pediatric cohort                  | Overall                        | 1.09                 | 0.94                              | 1.40                              | 1                                 |
| Pediatric cohort                  | Mild                           | 1.07                 | 0.90                              | 1.34                              | 1                                 |
| Pediatric cohort                  | Moderate                       | 1.03                 | 0.77                              | 1.21                              | 1                                 |
| Pediatric cohort                  | Severe                         | 1.65                 | 1.02                              | 2.69                              | 1.16                              |
| Adult cohort                      | Overall                        | 1.32                 | 1.24                              | 1.97                              | 1.79                              |
| Adult cohort                      | Mild                           | 1.14                 | 1.05                              | 1.54                              | 1.28                              |
| Adult cohort                      | Moderate                       | 1.43                 | 1.31                              | 2.21                              | 1.95                              |
| Adult cohort                      | Severe                         | 2.40                 | 2.00                              | 4.23                              | 3.41                              |
