# Supplementary material
Source: PubMed Central journal article supplement (PMC10469290)
Supplement: jamadermatol-e232875-s002.pdf [file jamadermatol-e232875-s002.pdf]

## Data Sharing Statement

Chiesa Fuxench. Risk of Inflammatory Bowel Disease in Patients With Atopic Dermatitis. *JAMA Dermatol*. Published August 30, 2023. doi:10.1001/jamadermatol.2023.2875

### Data

**Data available:** No

### Additional Information

**Explanation for why data not available:** THIN data can be accessed by researchers for specific research projects, subject to approval by the Scientific Review Committee of CSD Medical Research, UK. Data used for this study cannot be made available without such approval.
